# Supplementary material for: Preparation of Protein A Membranes Using Propargyl Methacrylate-Based Copolymers and Copper-Catalyzed Alkyne–Azide Click Chemistry
Source: MDPI journal article supplement (doi:10.3390/polym16020239), 2024-01-15
Supplement: s1 [file s1]

# Supplementary Materials: Preparation of Protein A Membranes Using Propargyl Methacrylate-based Copolymers and Copper-catalyzed Alkyne-Azide Click Chemistry

Joshua Osuofa and Scott M. Husson

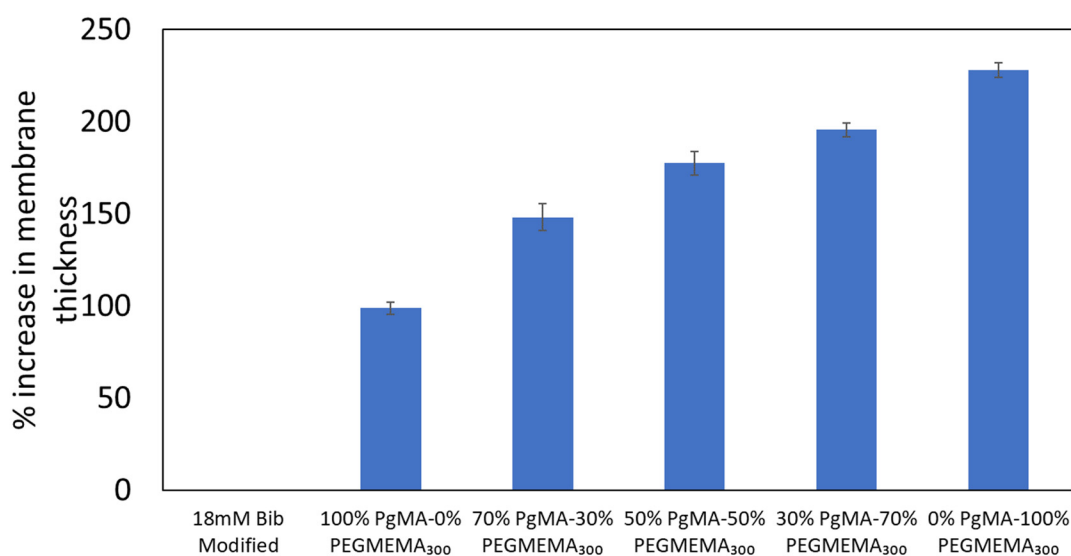

**Figure S1.** Percentage increase in membrane thickness as a function of PgMA-PEGMEMA<sub>300</sub> solution composition. Error bars represent standard deviation of at least three measurements.

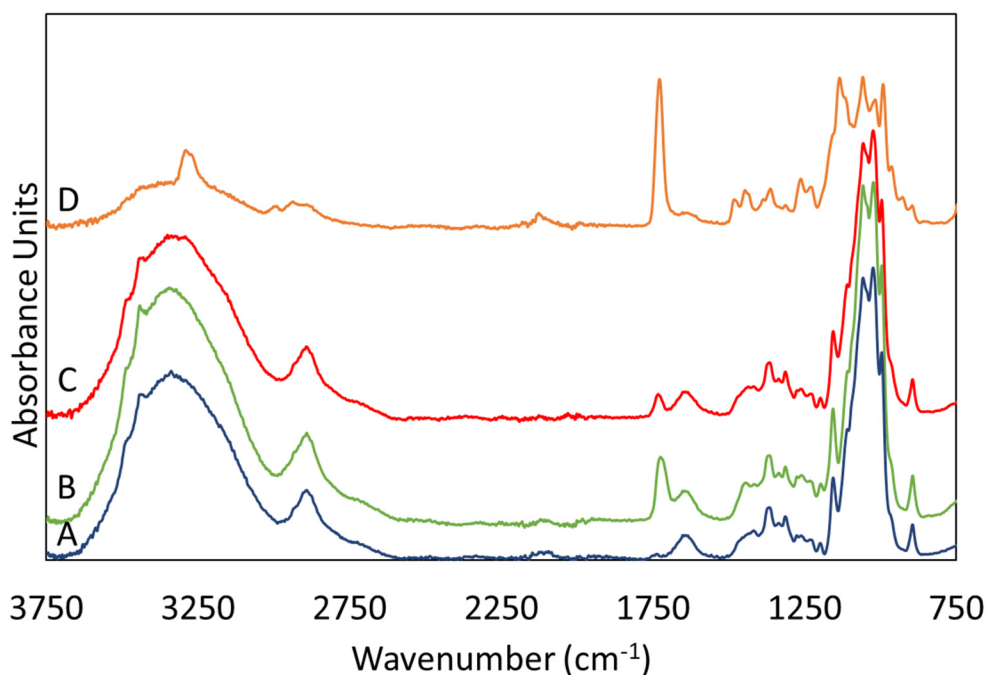

**Figure S2.** ATR-FTIR of PgMA-co-PEGMEMA<sub>300</sub> modified membranes prepared using different solvents: (A) unmodified membranes, (B) methanol, (C) acetone, (D) DMSO/H<sub>2</sub>O.

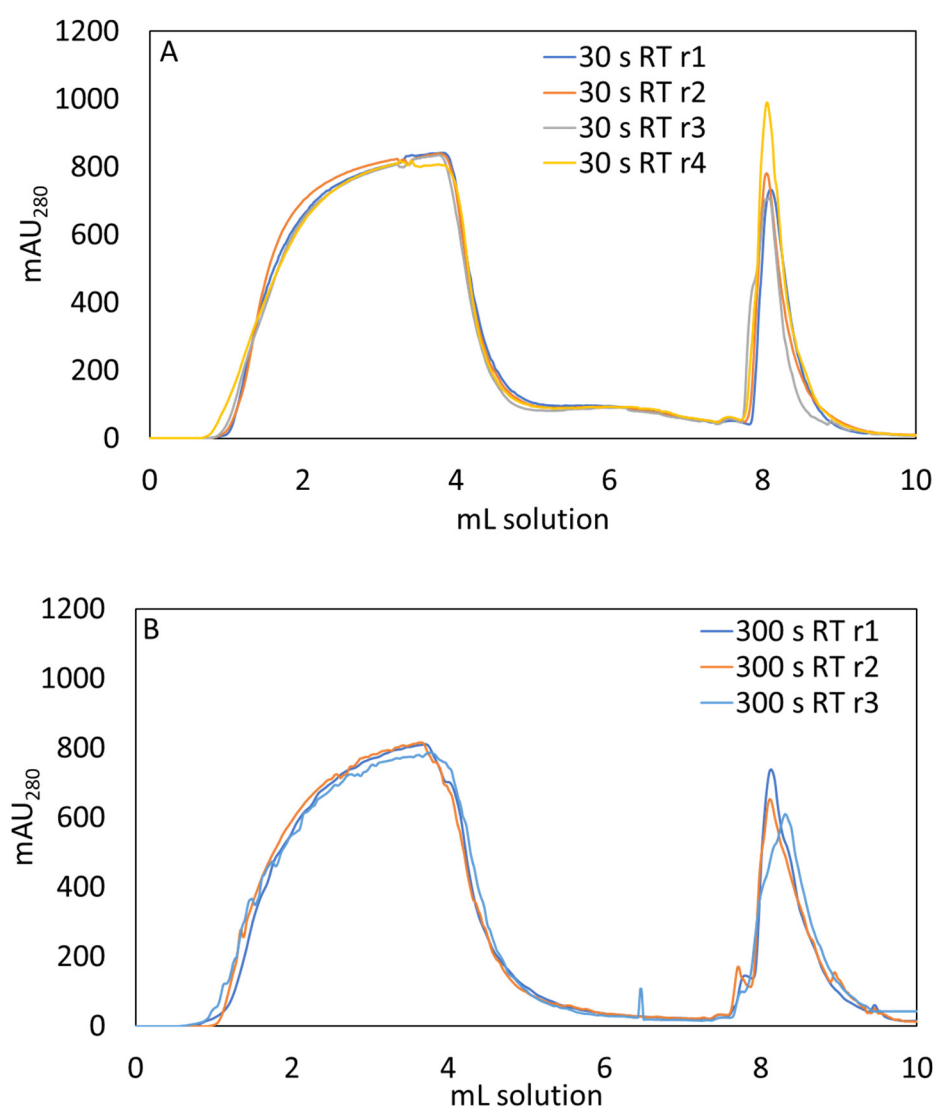

**Figure S3.** Bind-and-elute chromatograms of 30% PgMA-co-PEGMEMA<sub>300</sub> modified membranes prepared using 36 mM Bib and 5 h ATRP. (A) 30 second residence time. (B) 300 second residence time.
